# Supplementary material for: Differences in Bacterial Co-Occurrence Networks and Ecological Niches at the Surface Sediments and Bottom Seawater in the Haima Cold Seep
Source: MDPI journal article supplement (doi:10.3390/microorganisms11123001), 2023-12-18
Supplement: s1 [file s1]

# Differences in Bacterial Co-Occurrence Networks and Ecological Niches at the Surface Sediments and Bottom Seawater in the Haima Cold Seep

Song Zhong <sup>1,2,†</sup>, Jingchun Feng <sup>1,2,3,\*</sup>, Jie Kong <sup>2,3,†</sup>, Yongji Huang <sup>2,3</sup>, Xiao Chen <sup>2,3</sup> and Si Zhang <sup>2,3</sup>

- <sup>1</sup> Guangdong Provincial Key Laboratory of Water Quality Improvement and Ecological Restoration for Watersheds, Institute of Environmental and Ecological Engineering, Guangdong University of Technology, Guangzhou 510006, China; 1112124003@mail2.gdut.edu.cn
- <sup>2</sup> Research Centre of Ecology & Environment for Coastal Area and Deep Sea, Guangdong University of Technology, Guangzhou 510006, China; kongjie@gmlab.ac.cn (J.K.); yjhuang@scsio.ac.cn (Y.H.); chen\_xiao@gmlab.ac.cn (X.C.); zhsimd@scsio.ac.cn (S.Z.)
- <sup>3</sup> Southern Marine Science and Engineering Guangdong Laboratory (Guangzhou), Guangzhou 511458, China
- \* Correspondence: fengjc@gdut.edu.cn
- † These authors contributed equally to this work.

## **List of supplemental information**

**Table S1.** The details of seawater sample information of raw sequences deposited at the NCBI.

**Table S2.** The details of sediment sample information of raw sequences deposited at the NCBI. Depth, the distance relative to the top of sediment core.

**Table S3.** Geochemical characteristics of the seawater and sediment above the Haima cold seep across vertical profile. CH<sub>4</sub> (μmol/L), Mn (mg/L), Ba (mg/L), Mg (mg/L), Ca (mg/L), TOC (mg/L), SO<sub>4</sub><sup>2-</sup>(mg/L), K(mg/L).

**Table S4.** α-diversities of the prokaryotic communities in the seawater and sediment above the Haima cold seep.

**Figure S1.** Venn diagrams of common and specific ASV at different sites.

**Table S1.** The details of seawater sample information of raw sequences deposited at the NCBI.

| <i>Bioproject ID</i> | <i>SRA accession number</i> | Site | Water depth |
|----------------------|-----------------------------|------|-------------|
| PRJNA909048          | SRX18543112                 | ROV1 | 1350 m      |
| PRJNA909048          | SRX18543114                 | ROV2 | 1350 m      |
| PRJNA909048          | SRX18543125                 | ROV3 | 1350 m      |
| PRJNA909048          | SRX18543147                 | ROV5 | 1350 m      |

**Table S2.** The details of sediment sample information of raw sequences deposited at the NCBI. Depth, the distance relative to the top of sediment core.

| <i>Bioproject ID</i> | <i>SRA accession number</i> | Site | Depth |
|----------------------|-----------------------------|------|-------|
| PRJNA845826          | SRX15602217                 | ROV1 | 5cm   |
| PRJNA845826          | SRX15601990                 | ROV2 | 5cm   |
| PRJNA845826          | SRX15602176                 | ROV3 | 6cm   |
| PRJNA845826          | SRX15602145                 | ROV5 | 5cm   |

**Table S3.** Geochemical characteristics of the seawater and sediment above the Haima cold seep across vertical profile. CH<sub>4</sub> (μmol/L), Mn (mg/L), Ba (mg/L), Mg (mg/L), Ca (mg/L), TOC (mg/L), SO<sub>4</sub><sup>2-</sup>(mg/L), K(mg/L).

| Site | Type     | CH <sub>4</sub> | Mn     | Ba    | Mg    | Ca    |
|------|----------|-----------------|--------|-------|-------|-------|
| ROV1 | seawater | 0.0136          | 0.573  | 1.119 | 0.785 | 0.22  |
|      | sediment | 19.499          | 2.177  | 2.11  | 1.567 | 0.489 |
| ROV2 | seawater | 0.1001          | 0.671  | 0.973 | 0.969 | 0.271 |
|      | sediment | 17.947          | 2.273  | 2.53  | 1.173 | 0.386 |
| ROV3 | seawater | 0.2443          | 0.632  | 0.834 | 1.516 | 0.417 |
|      | sediment | 1.6299          | 0.242  | 0.34  | 1.164 | 0.321 |
| ROV5 | seawater | 0.0433          | 0.5104 | 0.555 | 1.757 | 0.541 |
|      | sediment | 1.5142          | 0.502  | 1.086 | 1.71  | 0.557 |

**Table S3.** Geochemical characteristics of the seawater and sediment above the Haima cold seep across vertical profile. CH<sub>4</sub> (μmol/L), Mn (mg/L), Ba (mg/L), Mg (mg/L), Ca (mg/L), TOC (mg/L), SO<sub>4</sub><sup>2-</sup>(mg/L), K(mg/L), Cl<sup>-</sup>(mg/L) (continued).

| Site | Type     | TOC   | SO <sub>4</sub> <sup>2-</sup> | K   | Cl <sup>-</sup> |
|------|----------|-------|-------------------------------|-----|-----------------|
| ROV1 | seawater | 4.336 | 1017                          | 261 | 19791           |
|      | sediment | 10.5  | 1831                          | 636 | 19801           |
| ROV2 | seawater | 4.311 | 972                           | 295 | 19932           |
|      | sediment | 10.51 | 2106                          | 352 | 20158           |
| ROV3 | seawater | 4.179 | 1528                          | 427 | 19495           |
|      | sediment | 9.068 | 2014                          | 746 | 20578           |
| ROV5 | seawater | 4.442 | 1637                          | 580 | 19871           |
|      | sediment | 7.35  | 2171                          | 580 | 20656           |

**Table S4.** α-diversities of the prokaryotic communities in the seawater and sediment above the Haima cold seep.

| Site | Type     | Sobs of ASV | Chao1 richness | Ace richness | Shannon diversity | Coverage |
|------|----------|-------------|----------------|--------------|-------------------|----------|
| ROV1 | seawater | 975         | 1447           | 1684         | 4                 | 0.99     |
|      | sediment | 1412        | 1478           | 1466         | 6                 | 0.99     |
| ROV2 | seawater | 1032        | 1572           | 1772         | 4                 | 0.99     |
|      | sediment | 1008        | 1077           | 1057         | 5                 | 0.99     |
| ROV3 | seawater | 1066        | 1512           | 1766         | 4                 | 0.99     |
|      | sediment | 351         | 373            | 371          | 3                 | 0.99     |

**Table S4.** α-diversities of the prokaryotic communities in the seawater and sediment above the Haima cold seep (continued).

| Site | Type     | Sobs of ASV | Chao1 richness | Ace richness | Shannon diversity | Coverage |
|------|----------|-------------|----------------|--------------|-------------------|----------|
| ROV5 | seawater | 694         | 1111           | 1340         | 2                 | 0.99     |
|      | sediment | 436         | 474            | 458          | 4                 | 0.99     |

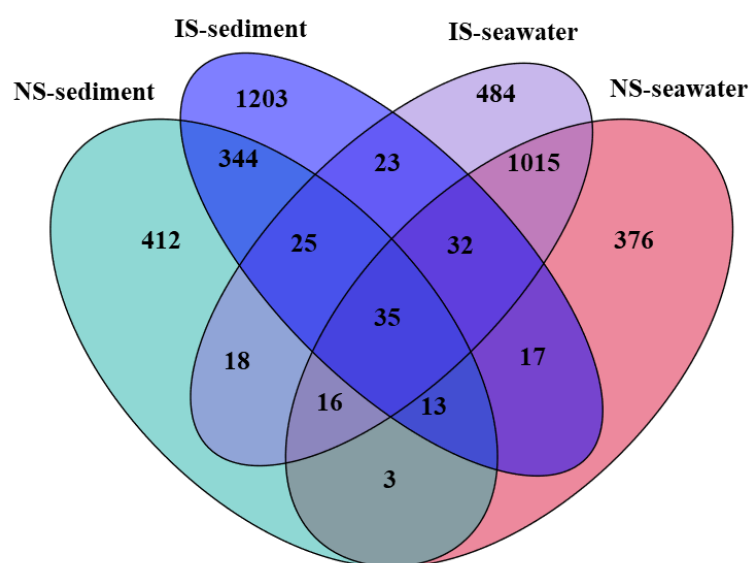

**Figure S1.** Venn diagrams of common and specific ASV at different sites.
